# Supplementary material for: GUCY2D-Associated Leber Congenital Amaurosis: A Retrospective Natural History Study in Preparation for Trials of Novel Therapies
Source: PubMed Central journal article supplement (PMC7013380; doi:10.1016/j.ajo.2019.10.019), 2020-02
Supplement: mmc2.pdf [file mmc2.pdf]

Supplementary table 1. *GUCY2D* variants characterisation

| Patient | Family ID | Variant                    | Protein effect      | Variant type     | gnomAD<br>MAF | Polyphen2 prediction      | SIFT prediction  | Human Splicing Finder prediction                                         |
|---------|-----------|----------------------------|---------------------|------------------|---------------|---------------------------|------------------|--------------------------------------------------------------------------|
| P1      | GC12356   | c.307G>A*                  | p.(Glu103Lys)*      | missense         | N/A           | probably damaging (1)     | Damaging (0.049) |                                                                          |
|         |           | c.238_252delGCCGCCGCCGCCTG | p.(Ala80_Leu84del)  | inframe deletion | 0.00002134    |                           |                  |                                                                          |
| P2A     | GC19319   | c.307G>A*                  | p.(Glu103Lys)*      | missense         | N/A           | probably damaging (1)     | Damaging (0.049) |                                                                          |
|         |           | c.1762C>T                  | p.(Arg588Trp)       | missense         | N/A           | probably damaging (1)     | Damaging (0)     |                                                                          |
| P2B     | GC19319   | c.307G>A*                  | p.(Glu103Lys)*      | missense         | N/A           | probably damaging (1)     | Damaging (0.049) |                                                                          |
|         |           | c.1762C>T                  | p.(Arg588Trp)       | missense         | N/A           | probably damaging (1)     | Damaging (0)     |                                                                          |
| P3      | GC1015    | c.380C>T                   | p.(Pro127Leu)       | missense         | 0.00002115    | probably damaging (0.999) | Damaging (0.007) |                                                                          |
|         |           | c.901_908delCTTCGCAG       | p.(Leu301Glyfs*15)  | frameshift       | N/A           |                           |                  |                                                                          |
| P4      | GC17851   | c.553G>C                   | p.(Ala185Pro)       | missense         | N/A           | probably damaging (1)     | Damaging (0.009) |                                                                          |
|         |           | c.721+5G>T                 |                     | splicing         | 0.00000438    |                           |                  | Alteration of the WT donor site,<br>most probably affecting splicing.    |
| P5      | GC19719   | c.307G>A*                  | p.(Glu103Lys)*      | missense         | N/A           | probably damaging (1)     | Damaging (0.049) |                                                                          |
|         |           | c.2872A>C                  | p.(Ser958Arg)       | missense         | N/A           | probably damaging (0.975) | Damaging (0.028) |                                                                          |
| P6      | GC3264    | c.652delA                  | p.(Met218Trpfs*13)  | frameshift       | N/A           |                           |                  |                                                                          |
| P7      | GC22697   | c.2837C>A                  | p.(Ala946Glu)       | missense         | N/A           | probably damaging (1)     | Damaging (0.001) |                                                                          |
|         |           | c.2969G>T                  | p.(Gly990Val)       | missense         | N/A           | probably damaging (1)     | Damaging (0)     |                                                                          |
| P8A     | GC19606   | c.3056A>C                  | p.(His1019Pro)      | missense         | 0.00000408    | probably damaging (1)     | Damaging (0.003) |                                                                          |
| P8B     | GC19606   | c.3056A>C                  | p.(His1019Pro)      | missense         | 0.00000408    | probably damaging (1)     | Damaging (0.003) |                                                                          |
| P9      | GC16211   | c.3098_3099insCGTGCTCT     | p.(Gly1034Valfs*15) | frameshift       | N/A           |                           |                  |                                                                          |
| P10     | GC16935   | c.1343C>A                  | p.(Ser448*)         | nonsense         | 0.00003313    |                           |                  |                                                                          |
|         |           | c.1958delG                 | p.(Gly653Glufs*2)   | frameshift       | N/A           |                           |                  |                                                                          |
| P11     | GC16929   | c.2302C>T                  | p.(Arg768Trp)       | missense         | 0.00014149    | probably damaging (1)     | Damaging (0)     |                                                                          |
|         |           | c.1978C>T                  | p.(Arg660*)         | nonsense         | 0.00000398    |                           |                  |                                                                          |
| P12     | GC18677   | c.2384G>A                  | p.(Arg795Gln)       | missense         | N/A           | probably damaging (1)     | Damaging (0)     |                                                                          |
|         |           | c.1211T>C                  | p.(Leu404Pro)       | missense         | N/A           | probably damaging (0.988) | Damaging (0.001) |                                                                          |
| P13     | GC1036    | c.307G>A*                  | p.(Glu103Lys)*      | missense         | N/A           | probably damaging (1)     | Damaging (0.049) |                                                                          |
|         |           | c.2849C>T                  | p.(Ala950Val)       | missense         | N/A           | probably damaging (0.976) | Damaging (0.034) |                                                                          |
| P14     | GC17418   | c.c.2120T>C                | p.(Leu707Pro)       | missense         | N/A           | probably damaging (1)     | Damaging (0.001) |                                                                          |
| P15     | GC24539   | c.3044-2A>G                |                     | splicing         | N/A           |                           |                  | Alteration of the WT acceptor site,<br>most probably affecting splicing. |
| P16     | GC18674   | c.2944+1delG               |                     | splicing         | 0.000467209   |                           |                  | Alteration of the WT donor site,<br>most probably affecting splicing.    |
|         |           | c.2858C>T                  | p.(Ser953Leu)       | missense         | N/A           | possibly damaging (0.675) | Damaging (0.005) |                                                                          |
| P17     | GC24284   | c.1694T>C                  | p.(Phe565Ser)       | missense         | 0.00000398    | probably damaging (0.998) | Damaging (0.022) |                                                                          |
|         |           | c.2633_2636delAAGT         | p.(Gln878Argfs*17)  | frameshift       | N/A           |                           |                  |                                                                          |
| P18     | GC17645   | c.129_134delTCTGCT         | p.(Leu44_Leu45del)  | inframe deletion | 0.00168588    |                           |                  |                                                                          |
| P19     | GC17984   | c.2944delG                 | p.(Gly982Valfs*39)  | frameshift       | N/A           |                           |                  |                                                                          |
|         |           | c.2291delC                 | p.(Pro764Leufs*20)  | frameshift       | 0.00000398    |                           |                  |                                                                          |
