# Supplementary material for: GUCY2D-Associated Leber Congenital Amaurosis: A Retrospective Natural History Study in Preparation for Trials of Novel Therapies
Source: PubMed Central journal article supplement (PMC7013380; doi:10.1016/j.ajo.2019.10.019), 2020-02
Supplement: mmc3.pdf [file mmc3.pdf]

**Supplementary table 2: Clinical Data**

| Subject | Age of onset | Principal Symptom(s)*                                         | Age (y) | Fundus Appearance                                                                                        | VA (LogMAR)                | Latest refractive error                       |
|---------|--------------|---------------------------------------------------------------|---------|----------------------------------------------------------------------------------------------------------|----------------------------|-----------------------------------------------|
| P1      | < 3mo        | Nystagmus                                                     | 34      | Unremarkable<br>Disc pallor<br>Thin vessels                                                              | R: 1.3<br>L: 1.2           | R: +1.00/-2.00 x 70°<br>L: +1.00              |
|         |              |                                                               | 56      | Unchanged                                                                                                | R: 1.3<br>L: 1.3           |                                               |
| P2A     | 1-3yo        | Nystagmus<br>Photophobia                                      | 53      | Poorly defined macula,<br>Central RPE atrophy.<br>Hyperpigmented area inferotemporal to the right macula | R: 1.8<br>L: 1.5           | R: +1.50/-0.50 x 20°<br>L: +1.75/-1.75 x 160° |
|         |              |                                                               | 63      | Unchanged                                                                                                | R: 1.8<br>L: 1.6           |                                               |
| P2B     | 3-12mo       | Nystagmus<br>Photophobia                                      | 54      | Poorly defined macula<br>RPE atrophy<br>Small foci of hypertrophy                                        | BE: HM                     | Emmetropia                                    |
|         |              |                                                               | 58      | Unchanged                                                                                                | BE: HM                     |                                               |
| P3      | < 3mo        | Nystagmus<br>Photophobia                                      | 4       | Central and mid peripheral RPE atrophy                                                                   | BE: 0.78                   | R: -0.50/-4.00 x 10°<br>L: +0.50/-4.00 x 170° |
|         |              |                                                               | 60      | Unchanged                                                                                                | R: 1.3<br>L: 1.0           |                                               |
| P4      | < 3mo        | Nyctalopia<br>Reduced color vision                            | 14      | Blonde fundus                                                                                            | R: 0.4<br>L: 0.5           | R: -3.75/-1.00 x 5°<br>L: -3.75/-2.50 x 180°  |
|         |              |                                                               | 23      | Unchanged                                                                                                | R: 0.48<br>L: 0.6          |                                               |
| P5      | < 3mo        | Nystagmus<br>No eye contact<br>Nyctalopia<br>Glare in daytime | 8       | Peripheral hypopigmentation                                                                              | R: 0.48<br>L: 0.62         | R: +2.00/-2.25 x 5°<br>L: +2.50/-2.25 x 180°  |
|         |              |                                                               | 11      | Unchanged                                                                                                | R: 0.48<br>L: 0.54         |                                               |
| P6      | < 3mo        | Nystagmus<br>Eye poking<br>Nyctalopia                         | 17      | Unremarkable                                                                                             | BE: NPL                    | NA                                            |
|         |              |                                                               | 27      | Unchanged                                                                                                | BE: NPL                    |                                               |
| P7      | < 3mo        | Nystagmus<br>Eye poking<br>Nyctalopia                         | 1       | Blonde fundus                                                                                            | BE: NPL                    | BE: +7.00                                     |
|         |              |                                                               | 2       | Unchanged                                                                                                | BE: NPL                    |                                               |
| P8A     | < 3mo        | Nystagmus<br>Nyctalopia<br>Eye poking                         | 14      | Unremarkable fundus apart from thin vessels                                                              | BE: HM                     | NA                                            |
|         |              |                                                               | 12      | Unchanged                                                                                                | BE: HM                     |                                               |
| P8B     | < 3mo        | Nystagmus<br>Not fixing<br>Eye poking                         | 1       | Unremarkable                                                                                             | BE: fixate at large object | BE: +7.00                                     |
|         |              |                                                               | 11      | Unchanged                                                                                                | BE: HM                     |                                               |
| P9      | 3-12mo       | Nystagmus<br>Photophobia<br>Nyctalopia                        | 1       | Unremarkable                                                                                             | BE: fixate at large object | BE +5.00                                      |
|         |              |                                                               | 16      | Waxy optic discs and thin retinal vessels                                                                | BE: 1.2                    |                                               |

**Supplementary table 2: Clinical Data**

|            |        |                                               |    |                                                                                                                                       |                            |                                              |
|------------|--------|-----------------------------------------------|----|---------------------------------------------------------------------------------------------------------------------------------------|----------------------------|----------------------------------------------|
| <b>P10</b> | 3-12mo | Nystagmus<br>Eye poking                       | 17 | Unremarkable                                                                                                                          | BE: NPL                    | NA                                           |
|            |        |                                               | 27 | Unchanged                                                                                                                             | BE: NPL                    |                                              |
| <b>P11</b> | 3-12mo | Nystagmus<br>Eye poking                       | <1 | Unremarkable                                                                                                                          | BE: PL                     | BE +4.50/+1.50 x 90°                         |
|            |        |                                               | 1  | Unchanged                                                                                                                             | BE: PL                     |                                              |
| <b>P12</b> | < 3mo  | Nystagmus<br>Poor vision                      | 2  | Unremarkable                                                                                                                          | BE: HM                     | RE +6.50/-1.00 x 25°<br>LE +6.50/1.00 x 160° |
|            |        |                                               | 16 | Minimal retinal atrophy                                                                                                               | BE: CF                     |                                              |
| <b>P13</b> | < 3mo  | Nystagmus                                     | 60 | Peripheral RPE atrophy<br>Pigment hypertrophy with large lacunae of chorioretinal atrophy peripherally<br>Disc pallor<br>Thin vessels | BE: HM                     | NA                                           |
|            |        |                                               | 79 | Unchanged                                                                                                                             | BE: PL                     |                                              |
| <b>P14</b> | 3-12mo | Nystagmus<br>Nyctalopia                       | 1  | Pale discs<br>Thin vessels<br>Fine pigment changes                                                                                    | BE: fixate at large object | Emmetropia                                   |
|            |        |                                               | 14 | Unchanged                                                                                                                             | BE: PL                     |                                              |
| <b>P15</b> | < 3mo  | Nystagmus<br>Eye poking                       | 1  | NA                                                                                                                                    | BE: NPL                    | R +10.00/-2.00 x 30°<br>LE +6.50/1.00 x 160° |
|            |        |                                               | 2  | Pale disc<br>Otherwise unremarkable                                                                                                   | BE: NPL                    |                                              |
| <b>P16</b> | < 3mo  | Poor color vision<br>Nystagmus<br>Photophobia | 10 | Unremarkable                                                                                                                          | R: 1.56<br>L: 1.76         | R: +1.25<br>L: +1.00                         |
|            |        |                                               | 19 | Unchanged                                                                                                                             | R: 2.00<br>L: 1.76         |                                              |
| <b>P17</b> | < 3mo  | Nystagmus<br>Eye poking                       | 1  | Unremarkable<br>Thin vessels                                                                                                          | BE: PL                     | BE: +8.50                                    |
|            |        |                                               | 3  | Unchanged                                                                                                                             | BE: PL                     |                                              |
| <b>P18</b> | < 3mo  | Nystagmus<br>Eye poking<br>Photophobia        | 6  | Blonde fundus                                                                                                                         | BE: PL                     | R: -7.00<br>L: -8.00                         |
|            |        |                                               | 10 | Unchanged                                                                                                                             | BE: PL                     |                                              |
| <b>P19</b> | < 3mo  | Nystagmus                                     | 8  | Unremarkable                                                                                                                          | BE: PL                     | R: +7.50<br>L: +6.50/+3.00 x 125°            |
|            |        |                                               | 18 | Unchanged                                                                                                                             | BE: PL                     |                                              |

\*All patients presented with reduced visual acuity

R; right eye, L; left eye, BE; both eyes, mo; months old, yo; years old, y; years, PL; light perception, NPL = no perception of light; HM = hand motions; NA= not available
